# Supplementary material
Source: PubMed Central journal article supplement (PMC7243596)
Supplement: NIHMS1580542-supplement-8.pdf [file NIHMS1580542-supplement-8.pdf]

**Table S1** Cryo-EM data collection, refinement and validation statistics (Related to Fig. 3,4,5)

|                                                     | (EMDB-0510)<br>(PDB 6NTS) |
|-----------------------------------------------------|---------------------------|
| <b>Data collection and processing</b>               |                           |
| Magnification                                       | 130,000                   |
| Voltage (keV)                                       | 300                       |
| Electron exposure (e <sup>-</sup> /Å <sup>2</sup> ) | 40                        |
| Defocus range (um)                                  | -1 ~ -3                   |
| Pixel Size (Å)                                      | 1.064                     |
| Symmetry imposed                                    | C1                        |
| Initial particle images (no.)                       | 869,372                   |
| Final particle images (no.)                         | 83,784                    |
| Map resolution (Å)                                  | 3.6                       |
| FSC threshold                                       | 0.143                     |
| Map resolution range (Å)                            | 3-5.5                     |
| <b>Refinement</b>                                   |                           |
| Model resolution (Å)                                | 3.8                       |
| FSC threshold                                       | 0.5                       |
| Model resolution range (Å)                          |                           |
| Map sharpening B factor (Å <sup>2</sup> )           | -86.2                     |
| Model composition                                   |                           |
| Non-hydrogen atoms                                  | 10,040                    |
| Protein residues                                    | 1,250                     |
| Ligands                                             | 1                         |
| B factors (Å <sup>2</sup> )                         |                           |
| Protein                                             | 80.68                     |
| Ligand                                              | 78.37                     |
| R.m.s deviations                                    |                           |
| Bond length (Å)                                     | 0.01                      |
| Bond angles (Å)                                     | 0.98                      |
| Validation                                          |                           |
| MolProbity score                                    | 1.62                      |
| Clashscore                                          | 3.86                      |
| Poor rotamers (%)                                   | 0.44                      |
| Ramachandran plot                                   |                           |
| Favored (%)                                         | 93.12                     |
| Allowed (%)                                         | 6.88                      |
| Disallowed (%)                                      | 0.00                      |
